# Supplementary material
Source: Springer Nature journal article supplement (https://www.springermedizin.de/resource/supplementary/12885_2013_3926_MOESM7_ESM.pdf/9464788)

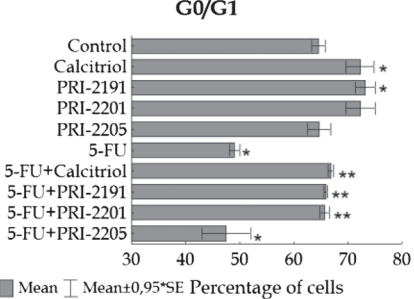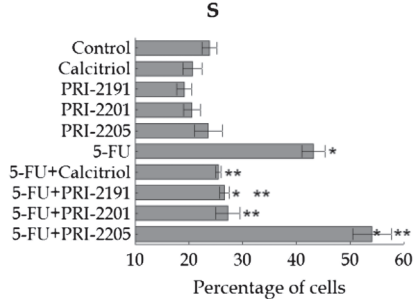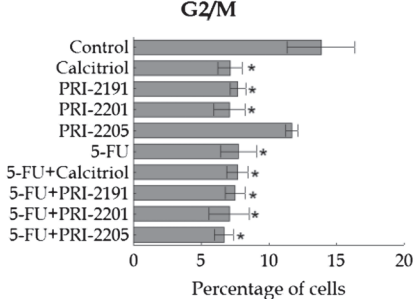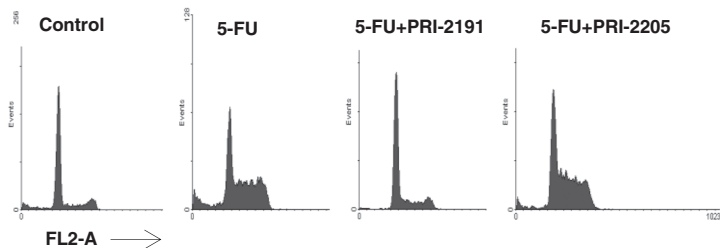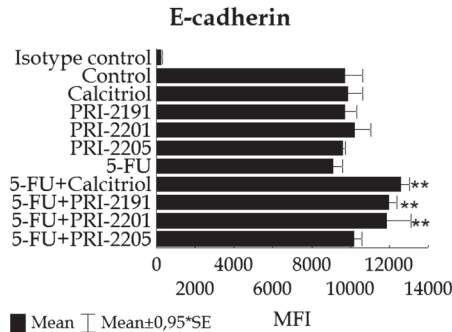

Supplement: MOESM7 [file 9464788]
